# Supplementary material for: A pan-cancer analysis of molecular characteristics and oncogenic role of gasdermins
Source: Springer Nature journal article supplement (doi:10.1186/s12935-022-02483-4), 2022-02-14

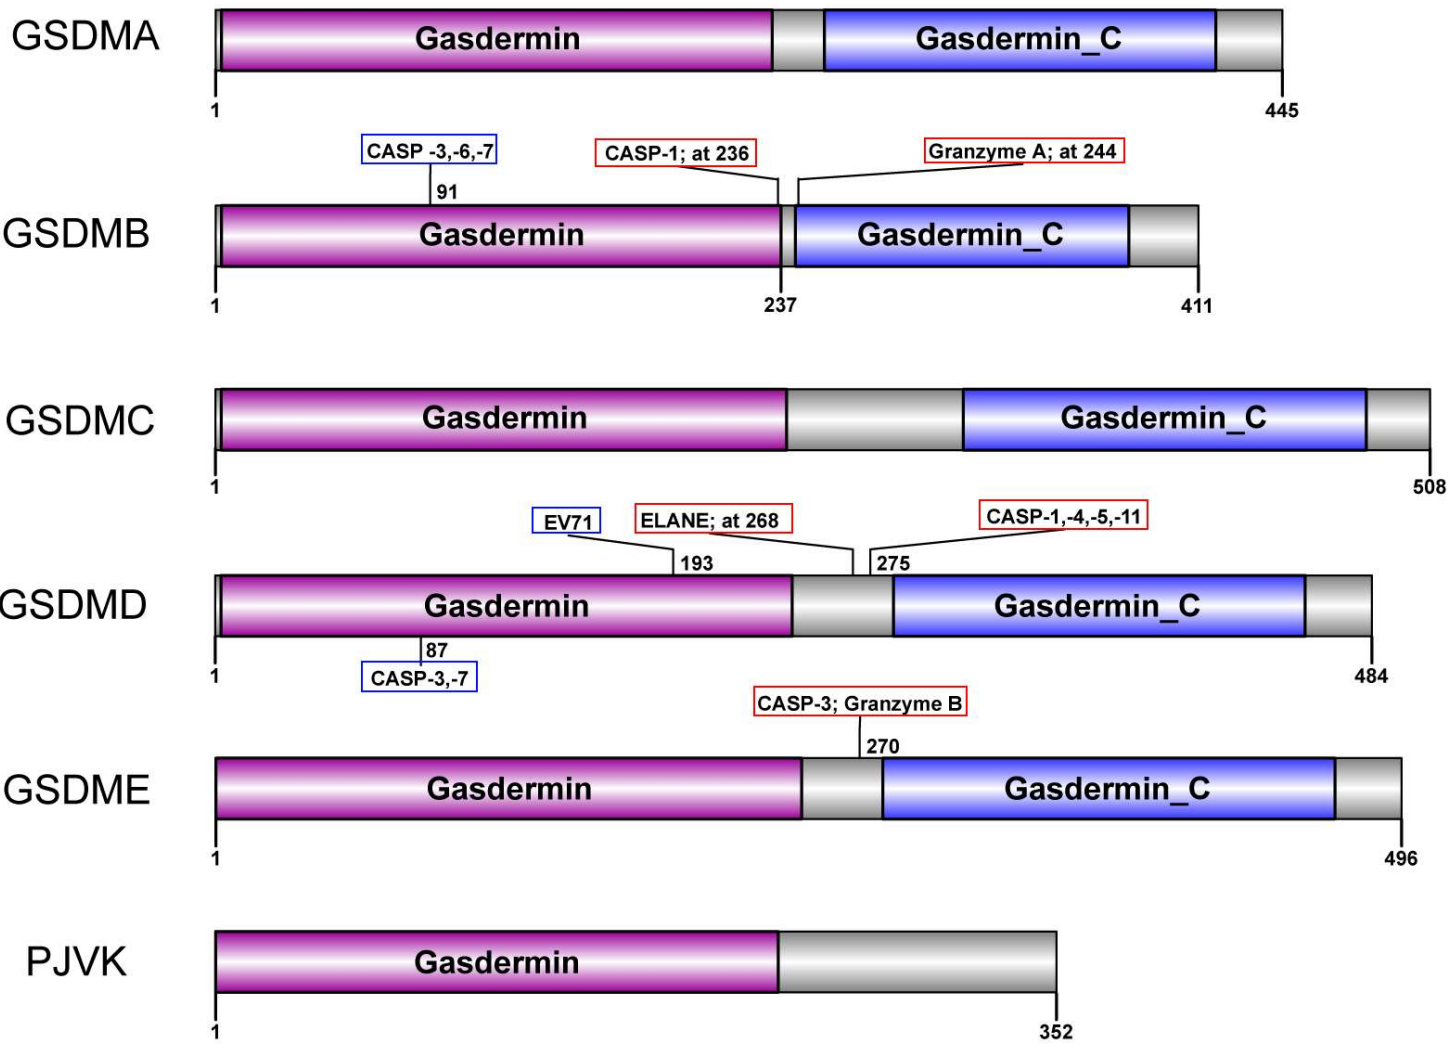

Supplement: MOESM2 [file 20131126]
