# Supplementary material for: A pan-cancer analysis of molecular characteristics and oncogenic role of gasdermins
Source: Springer Nature journal article supplement (doi:10.1186/s12935-022-02483-4), 2022-02-14
Supplement: MOESM3 [file 20131126]

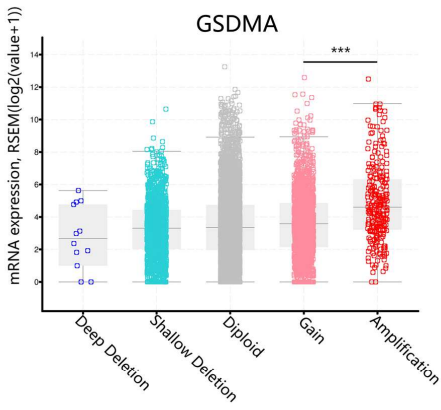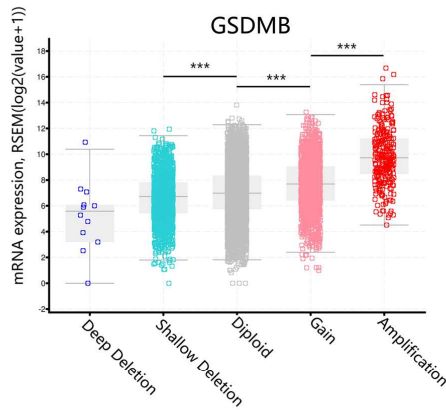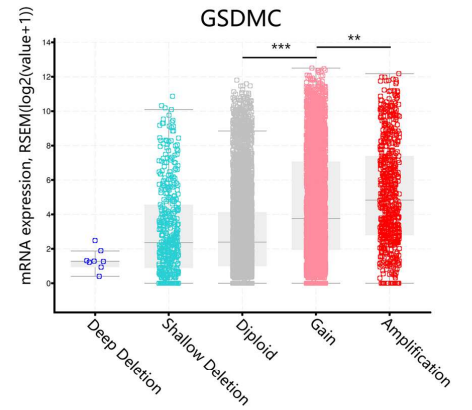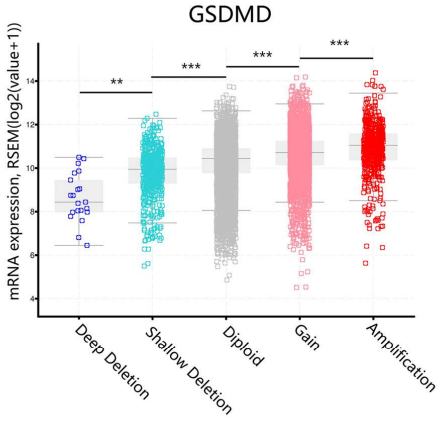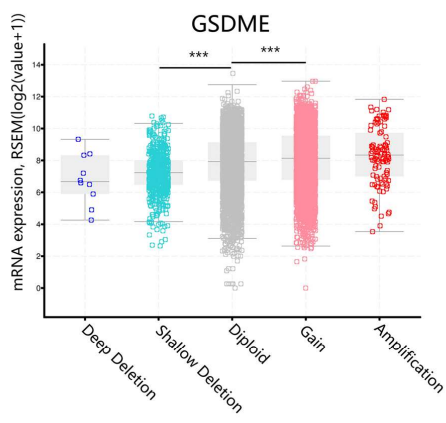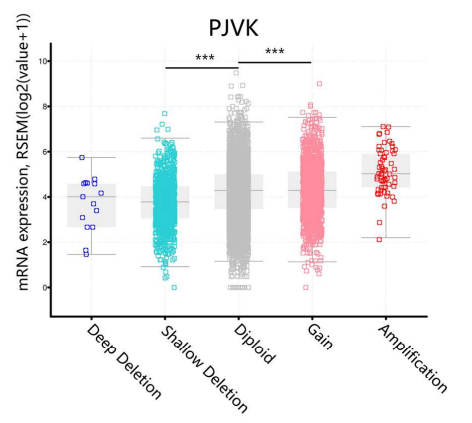

■ Amplification 
 ■ Gain 
 ■ Diploid 
 ■ Shallow Deletion 
 ■ Deep Deletion 
 \*\*\* P < 0.01
\*\* P < 0.05
