# Supplementary material for: A pan-cancer analysis of molecular characteristics and oncogenic role of gasdermins
Source: Springer Nature journal article supplement (doi:10.1186/s12935-022-02483-4), 2022-02-14
Supplement: MOESM4 [file 20131126]

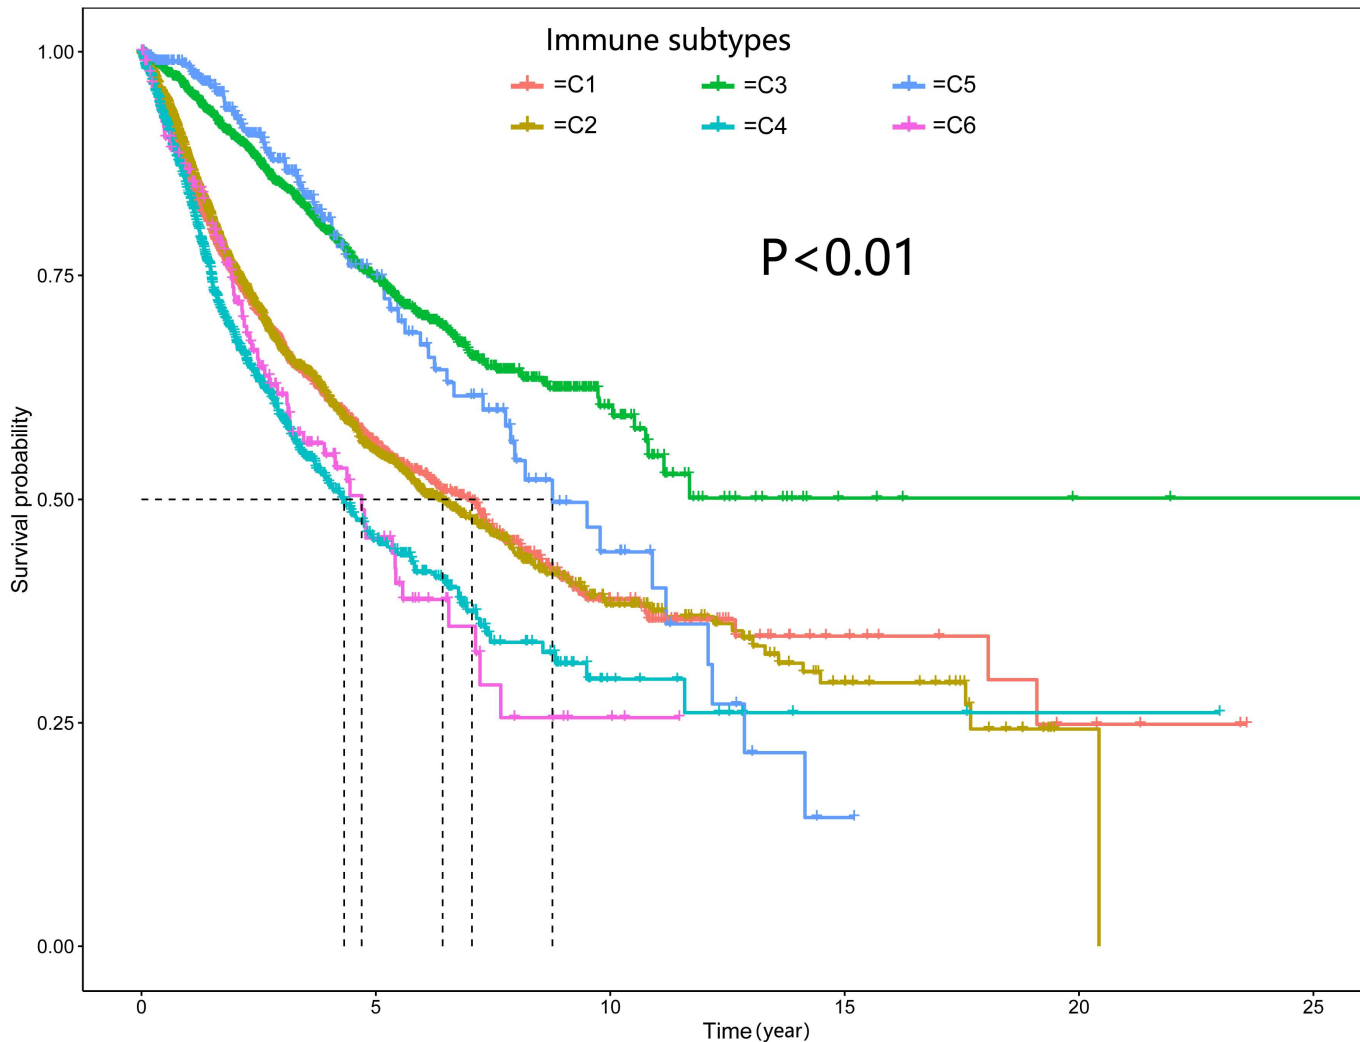

Number at risk

|    |      |     |    |    |    |    |
|----|------|-----|----|----|----|----|
| C1 | 2307 | 306 | 56 | 11 | 4  | 0  |
| C2 | 2459 | 394 | 77 | 23 | 1  | 0  |
| C3 | 2364 | 485 | 55 | 5  | 2  | 1  |
| C4 | 1132 | 123 | 11 | 2  | 1  | 0  |
| C5 | 376  | 64  | 15 | 1  | 0  | 0  |
| C6 | 175  | 29  | 3  | 0  | 0  | 0  |
|    | 0    | 5   | 10 | 15 | 20 | 25 |
